# Supplementary material
Source: publisher site journal article supplement (https://www.dovepress.com/article/468388)

**Supplementary material**

**Red blood cell distribution width predicts mortality in hospitalized patients with severe fever with thrombocytopenia syndrome**

Shaoqiu Zhang, Qun Zhang, Jian Wang, Yifan Pan, Zhiyi Zhang, Yu Geng, Bei Jia, Bing Tian, Yali Xiong, Xiaomin Yan, Jie Li, Huali Wang, Rui Huang, Chao Wu

**Table S1. Cox proportional hazards modeling of mortality risk stratified by age.**

**Figure S1. Flow chart of patient selection.**

**Table S1. Cox proportional hazards modeling of mortality risk stratified by age.**

| **Variables** | | **Univariate** | |  | **Multivariate** | |
| --- | --- | --- | --- | --- | --- | --- |
| **HR (95%CI)** | **P value** |  | **HR (95%CI)** | **P value** |
| **Age <60 yrs** | Sex |  |  |  |  |  |
| Female | Reference |  |  |  |  |
| Male | 0.780 (0.320-1.902) | 0.585 |  |  |  |
| WBC (109/L) | 1.024 (0.911-1.152) | 0.692 |  |  |  |
| RBC (1012/L) | 0.617 (0.330-1.154) | 0.130 |  |  |  |
| Hb (g/L) | 0.978 (0.960-0.997) | 0.021 |  |  |  |
| RDW (%) | 1.594 (1.178-2.156) | 0.002 |  | 1.530 (1.005-2.329) | 0.048 |
| PLT (109/L) | 0.986 (0.967-1.005) | 0.156 |  |  |  |
| ALT (U/L) | 1.002 (1.001-1.003) | 0.002 |  | 0.997 (0.990-1.004) | 0.439 |
| GGT (U/L) | 1.000 (0.998-1.002) | 0.873 |  |  |  |
| Cr (μmol/L) | 1.006 (1.001-1.011) | 0.030 |  | 0.996 (0.989-1.003) | 0.261 |
| BUN (mmol/L) | 1.074 (0.989-1.167) | 0.092 |  |  |  |
| TBil (μmol/L) | 1.005 (0.971-1.041) | 0.773 |  |  |  |
| PT (s) | 1.297 (1.112-1.513) | 0.001 |  | 1.224 (0.965-1.552) | 0.095 |
| APTT (s) | 1.042 (1.023-1.062) | <0.001 |  | 1.047 (1.017-1.077) | 0.002 |
| **Age ≥60 yrs** | Sex |  |  |  |  |  |
| Female | Reference |  |  |  |  |
| Male | 0.852 (0.486-1.494) | 0.577 |  |  |  |
| WBC (109/L) | 1.087 (1.020-1.158) | 0.010 |  | 1.117(1.040-1.199) | 0.002 |
| RBC (1012/L) | 0.901 (0.571-1.422) | 0.654 |  |  |  |
| Hb (g/L) | 0.997 (0.983-1.012) | 0.704 |  |  |  |
| RDW (%) | 1.181 (1.038-1.349) | 0.012 |  | 1.184 (1.027-1.366) | 0.020 |
| PLT (109/L) | 0.987 (0.976-0.998) | 0.024 |  | 0.987 (0.975-0.999) | 0.029 |
| ALT (U/L) | 1.001 (0.999-1.003) | 0.354 |  |  |  |
| GGT (U/L) | 1.001 (0.998-1.003) | 0.588 |  |  |  |
| Cr (μmol/L) | 1.005 (1.003-1.008) | <0.001 |  | 1.003 (1.000-1.006) | 0.096 |
| BUN (mmol/L) | 1.009 (1.003-1.015) | 0.003 |  | 1.009 (1.003-1.016) | 0.006 |
| TBil (μmol/L) | 0.998 (0.984-1.011) | 0.727 |  |  |  |
| PT (s) | 1.090 (1.032-1.151) | 0.002 |  | 1.051 (0.991-1.114) | 0.096 |
| APTT (s) | 1.006 (1.003-1.010) | 0.001 |  | 1.007 (1.003-1.012) | 0.002 |

**Abbreviations:** ALT, alanine aminotransferase; APTT, activated partial thromboplastin time; BUN, blood urea nitrogen; CI, confidence interval; Cr, creatinine; GGT, gama-glutamyl transpeptidase; Hb, hemoglobin; PLT, platelet count; PT, prothrombin time; RBC, red blood cell; RDW, red blood cell distribution width; TBil, total bilirubin; WBC, white blood cell.

**Figure S1. Flow chart of patient selection.**


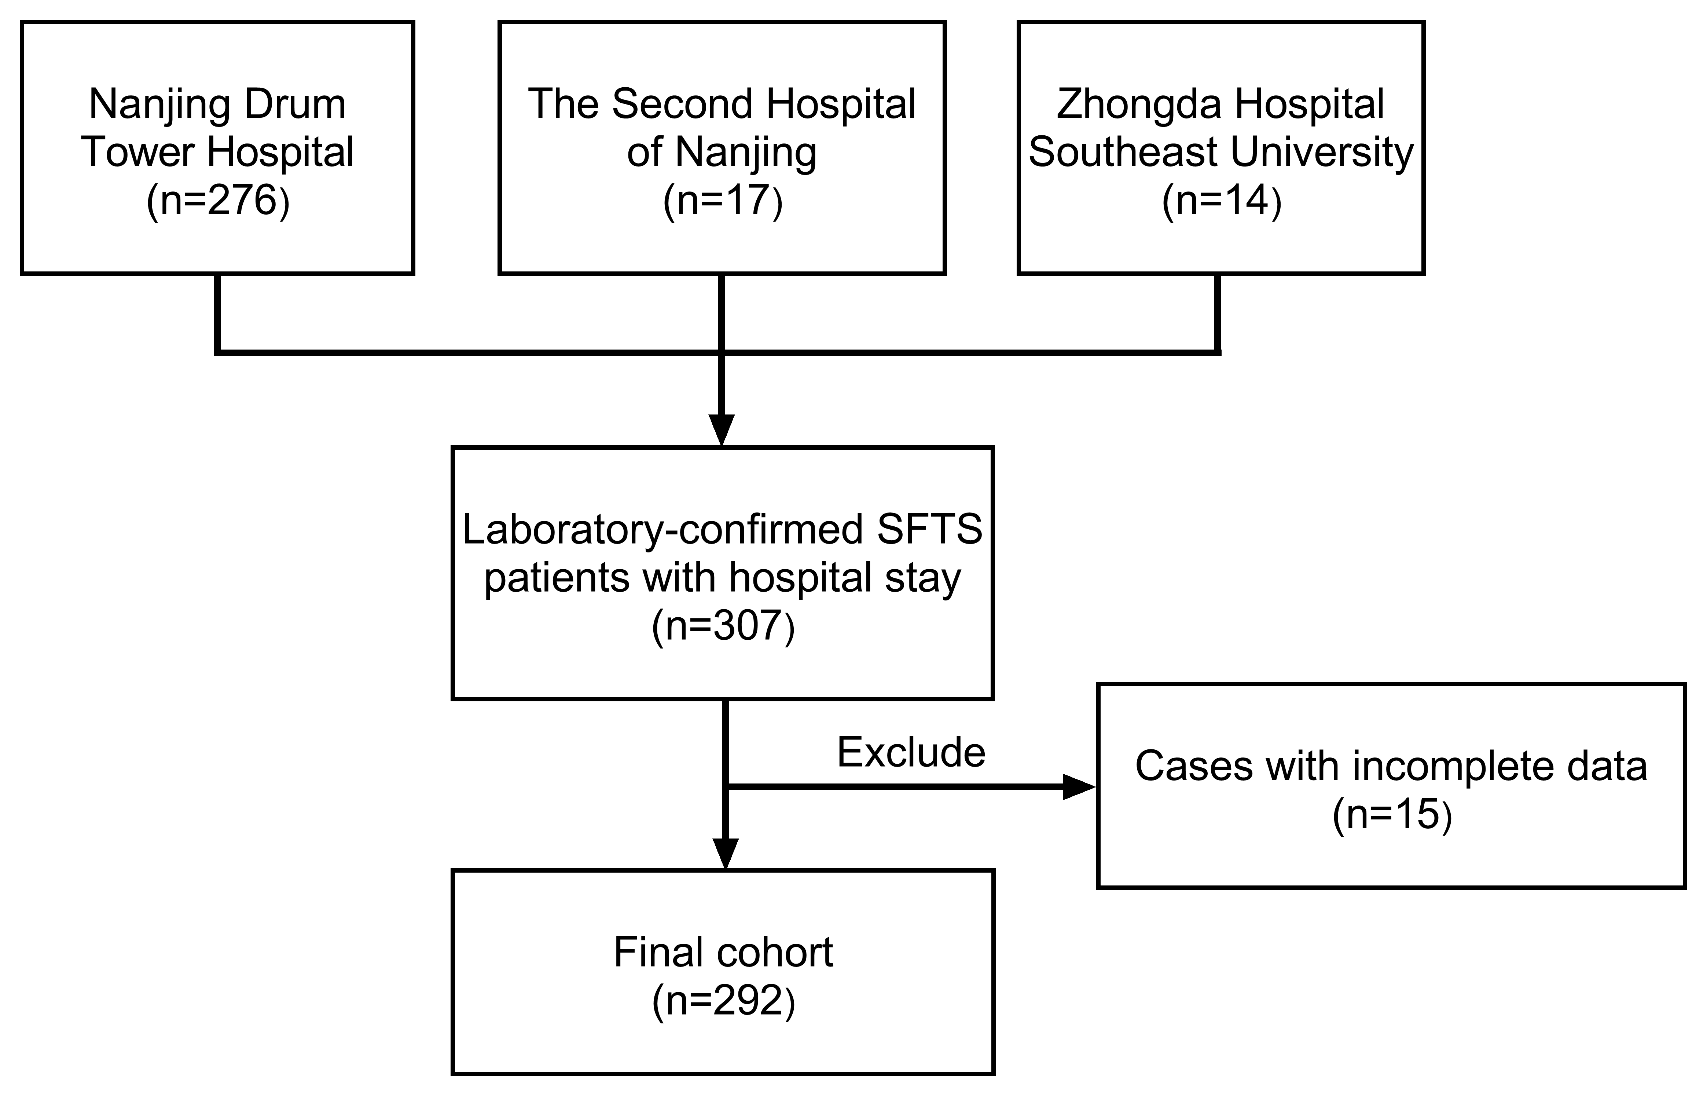

Supplement: Supplementary file 1 [file get_supplementary_file.php]
